# Supplementary material
Source: MDPI journal article supplement (https://www.mdpi.com/search?q=ijms-16-25954)
Supplement: s001 [file ijms-16-25954-s001.pdf]

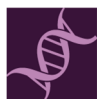

# Supplementary Information

**Table S1.** Compilation of selected nanoparticles data.

| Data Compilation: SiO <sub>2</sub> |           |                                      |                                          |          |            |              |                       |               |                   |
|------------------------------------|-----------|--------------------------------------|------------------------------------------|----------|------------|--------------|-----------------------|---------------|-------------------|
| Ref.                               | Size (nm) | Origin of NM/Synthesis Method        | Cells                                    | Organism | Phagocytes | Pos. Control | Concentration (µg/mL) | Exp. Time (h) | Ratio ROS/Control |
| [33]                               | 10        | Nanostructured & Amorphous Materials | A549 lung adenocarcinoma epithelial cell | human    | n          | n            | 200                   | 48            | 1.3               |
|                                    |           |                                      |                                          |          |            |              | 400                   | 48            | 1.4               |
|                                    | 80        | Nanostructured & Amorphous Materials | A549 lung adenocarcinoma epithelial cell | human    | n          | n            | 200                   | 48            | 1.2               |
|                                    |           |                                      |                                          |          |            |              | 400                   | 48            | 1.4               |
| [8]                                | 26        | Corpuscular Inc.                     | Hepatocytes liver                        | rat      | y          | y            | 0.384                 | 4             | 0.7               |
|                                    |           |                                      |                                          |          |            |              | 1.92                  | 4             | 0.7               |
|                                    |           |                                      |                                          |          |            |              | 9.6                   | 4             | 0.7               |
|                                    |           |                                      |                                          |          |            |              | 48                    | 4             | 0.7               |
|                                    |           |                                      |                                          |          |            |              | 240                   | 4             | 0.6               |
|                                    |           |                                      |                                          |          |            |              | 0.384                 | 24            | 0.7               |
|                                    |           |                                      |                                          |          |            |              | 1.92                  | 24            | 0.5               |
|                                    |           |                                      |                                          |          |            |              | 9.6                   | 24            | 0.6               |
|                                    |           |                                      |                                          |          |            |              | 48                    | 24            | 0.6               |
|                                    |           |                                      |                                          |          |            |              | 240                   | 24            | 0.6               |
|                                    |           |                                      |                                          |          |            |              | 0.384                 | 4             | 0.8               |
|                                    |           |                                      |                                          |          |            |              | 1.92                  | 4             | 1.0               |
| 9.6                                | 4         | 1.0                                  |                                          |          |            |              |                       |               |                   |
| 48                                 | 4         | 0.6                                  |                                          |          |            |              |                       |               |                   |
| 240                                | 4         | 0.6                                  |                                          |          |            |              |                       |               |                   |
| [8]                                | 52        | Corpuscular Inc.                     | Hepatocytes liver                        | rat      | y          | y            | 0.384                 | 24            | 1.0               |
|                                    |           |                                      |                                          |          |            |              | 1.92                  | 24            | 0.5               |
|                                    |           |                                      |                                          |          |            |              | 9.6                   | 24            | 0.5               |
|                                    |           |                                      |                                          |          |            |              | 48                    | 24            | 0.5               |
|                                    |           |                                      |                                          |          |            |              | 240                   | 24            | 0.4               |
|                                    |           |                                      |                                          |          |            |              | 0.384                 | 24            | 0.4               |

Table S1. Cont.

| Data Compilation: SiO <sub>2</sub> |                                 |                                 |                                          |          |            |              |                       |               |                   |
|------------------------------------|---------------------------------|---------------------------------|------------------------------------------|----------|------------|--------------|-----------------------|---------------|-------------------|
| Ref.                               | Size (nm)                       | Origin of NM/Synthesis Method   | Cells                                    | Organism | Phagocytes | Pos. Control | Concentration (µg/mL) | Exp. Time (h) | Ratio ROS/Control |
| [34]                               | 25                              | Sigma Aldrich                   | A549 lung adenocarcinoma epithelial cell | human    | n          | n            | 113                   | 24            | 2.4               |
|                                    |                                 |                                 |                                          |          |            |              | 130                   | 24            | 2.6               |
|                                    |                                 |                                 |                                          |          |            |              | 226                   | 24            | 2.9               |
|                                    |                                 |                                 |                                          |          |            |              | 338                   | 24            | 3.5               |
| [9]                                | 15                              | Wan Jing New Material Co., Ltd. | HaCaT epidermal keratinocyte             | human    | n          | n            | 2.5                   | 24            | 4.7               |
|                                    |                                 |                                 |                                          |          |            |              | 5                     | 24            | 6.5               |
|                                    |                                 |                                 |                                          |          |            |              | 10                    | 24            | 8.0               |
|                                    | 30                              | Wan Jing New Material Co., Ltd. | HaCaT epidermal keratinocyte             | human    | n          | n            | 2.5                   | 24            | 3.7               |
|                                    |                                 |                                 |                                          |          |            |              | 5                     | 24            | 4.0               |
|                                    |                                 |                                 |                                          |          |            |              | 10                    | 24            | 4.6               |
| 100                                | Wan Jing New Material Co., Ltd. | HaCaT epidermal keratinocyte    | human                                    | n        | n          | 2.5          | 24                    | 3.2           |                   |
|                                    |                                 |                                 |                                          |          |            | 5            | 24                    | 3.3           |                   |
|                                    |                                 |                                 |                                          |          |            | 10           | 24                    | 3.7           |                   |
| [55]                               | 30                              | Alfa Aesar                      | Hep-2 laryngeal epithelial               | human    | n          | n            | 125                   | 0.5           | 1.7               |
| [35]                               | 15                              | Degussa Co.                     | A549 lung adenocarcinoma epithelial cell | human    | n          | n            | 10                    | 48            | 1.4               |
|                                    |                                 |                                 |                                          |          |            |              | 50                    | 48            | 1.6               |
|                                    |                                 |                                 |                                          |          |            |              | 100                   | 48            | 1.9               |
| [77]                               | 20                              | sol-gel synthesizing            | HUVEC umbilical vein endothelial         | human    | n          | n            | 25                    | 3             | 1.0               |
|                                    |                                 |                                 |                                          |          |            |              | 50                    | 3             | 1.3               |
|                                    |                                 |                                 |                                          |          |            |              | 100                   | 3             | 1.5               |
|                                    |                                 |                                 |                                          |          |            |              | 200                   | 3             | 2.7               |
|                                    |                                 |                                 |                                          |          |            |              | 25                    | 24            | 1.3               |
|                                    |                                 |                                 |                                          |          |            |              | 50                    | 24            | 1.7               |
| 100                                | 24                              | 2.4                             |                                          |          |            |              |                       |               |                   |
| 200                                | 24                              | 3.2                             |                                          |          |            |              |                       |               |                   |

Table S1. Cont.

| Data Compilation: SiO <sub>2</sub> |           |                               |                                |          |            |              |                       |               |                   |
|------------------------------------|-----------|-------------------------------|--------------------------------|----------|------------|--------------|-----------------------|---------------|-------------------|
| Ref.                               | Size (nm) | Origin of NM/Synthesis Method | Cells                          | Organism | Phagocytes | Pos. Control | Concentration (µg/mL) | Exp. Time (h) | Ratio ROS/Control |
| [28]                               | 12        | Degussa Co.                   | RAW264.7 peritoneal macrophage | mouse    | y          | n            | 5                     | 24            | 1.1               |
|                                    |           |                               |                                |          |            |              | 10                    | 24            | 1.2               |
|                                    |           |                               |                                |          |            |              | 20                    | 24            | 1.2               |
|                                    |           |                               |                                |          |            |              | 40                    | 24            | 1.4               |
| [30]                               | 16        | Reverse microemulsion process | HK-2 kidney                    | human    | n          | y            | 5                     | 24            | 1.1               |
|                                    |           |                               |                                |          |            |              | 10                    | 24            | 1.1               |
|                                    |           |                               |                                |          |            |              | 25                    | 24            | 1.1               |
|                                    |           |                               |                                |          |            |              | 50                    | 24            | 1.3               |
|                                    |           |                               | LLC-PK1 tubular                | porcine  | n          | y            | 5                     | 24            | 1.3               |
|                                    |           |                               |                                |          |            |              | 10                    | 24            | 1.4               |
|                                    |           |                               |                                |          |            |              | 25                    | 24            | 1.6               |
|                                    |           |                               |                                |          |            |              | 50                    | 24            | 2.1               |
| [30]                               | 85        | Reverse microemulsion process | HK-2 kidney                    | human    | n          | y            | 5                     | 24            | 1.0               |
|                                    |           |                               |                                |          |            |              | 10                    | 24            | 1.1               |
|                                    |           |                               |                                |          |            |              | 25                    | 24            | 1.1               |
|                                    |           |                               |                                |          |            |              | 50                    | 24            | 1.3               |
|                                    |           |                               | LLC-PK1 tubular                | porcine  | n          | y            | 5                     | 24            | 1.1               |
|                                    |           |                               |                                |          |            |              | 25                    | 24            | 1.1               |
|                                    |           |                               |                                |          |            |              | 10                    | 24            | 1.2               |
|                                    |           |                               |                                |          |            |              | 50                    | 24            | 1.2               |
| [36]                               | 43        | Stöber method                 | HepG2 hepatocellular carcinoma | human    | n          | n            | 25                    | 3             | 1.5               |
|                                    |           |                               |                                |          |            |              | 50                    | 3             | 2.3               |
|                                    |           |                               |                                |          |            |              | 100                   | 3             | 2.7               |
|                                    |           |                               |                                |          |            |              | 200                   | 3             | 2.0               |
|                                    |           |                               |                                |          |            |              | 25                    | 24            | 1.2               |

Table S1. Cont.

| Data Compilation: SiO <sub>2</sub> |           |                                                                 |                                            |          |            |              |                       |               |                   |
|------------------------------------|-----------|-----------------------------------------------------------------|--------------------------------------------|----------|------------|--------------|-----------------------|---------------|-------------------|
| Ref.                               | Size (nm) | Origin of NM/Synthesis Method                                   | Cells                                      | Organism | Phagocytes | Pos. Control | Concentration (µg/mL) | Exp. Time (h) | Ratio ROS/Control |
|                                    |           |                                                                 |                                            |          |            |              | 50                    | 24            | 1.2               |
|                                    |           |                                                                 |                                            |          |            |              | 100                   | 24            | 1.7               |
|                                    |           |                                                                 |                                            |          |            |              | 200                   | 24            | 1.0               |
| [37]                               | 62        | Stöber method                                                   | HepG2 hepatocellular carcinoma             | human    | n          | n            | 25                    | 24            | 1.7               |
|                                    |           |                                                                 |                                            |          |            |              | 50                    | 24            | 2.1               |
|                                    |           |                                                                 |                                            |          |            |              | 75                    | 24            | 2.8               |
|                                    |           |                                                                 |                                            |          |            |              | 100                   | 24            | 3.1               |
| [32]                               | 20        | East China University of Science and Technology                 | PC12 pheochromocytoma                      | rat      | n          | n            | 25                    | 24            | 1.5               |
|                                    |           |                                                                 |                                            |          |            |              | 50                    | 24            | 1.9               |
|                                    |           |                                                                 |                                            |          |            |              | 100                   | 24            | 2.2               |
|                                    | 50        | East China University of Science and Technology                 | PC12 pheochromocytoma                      | rat      | n          | n            | 25                    | 24            | 1.2               |
|                                    |           |                                                                 |                                            |          |            |              | 50                    | 24            | 1.7               |
|                                    |           |                                                                 |                                            |          |            |              | 100                   | 24            | 2.0               |
| [64]                               | 20        | Runhe Co., Ltd.                                                 | primary embryo fibroblasts                 | mouse    | n          | n            | 5                     | 24            | 1.2               |
|                                    |           |                                                                 |                                            |          |            |              | 10                    | 24            | 1.5               |
|                                    |           |                                                                 |                                            |          |            |              | 20                    | 24            | 1.5               |
|                                    |           |                                                                 |                                            |          |            |              | 50                    | 24            | 2.2               |
|                                    |           |                                                                 |                                            |          |            |              | 100                   | 24            | 2.6               |
|                                    | 21        | Sol-gel method. East China University of Science and Technology | H9c2(2-1) embryonic ventricular myocardial | rat      | n          | n            | 100                   | 24            | 1.6               |
|                                    |           |                                                                 |                                            |          |            |              | 300                   | 24            | 3.1               |
| [29]                               |           |                                                                 | L-02 hepatic                               | human    | n          | n            | 200                   | 24            | 1.1               |
|                                    |           |                                                                 |                                            |          |            |              | 400                   | 24            | 1.5               |
|                                    |           |                                                                 |                                            |          |            |              | 600                   | 24            | 3.7               |
|                                    | 49        | Sol-gel method. East China University of Science and Technology | H9c2(2-1) embryonic ventricular myocardial | rat      | n          | n            | 100                   | 24            | 1.2               |
|                                    |           |                                                                 |                                            |          |            |              | 300                   | 24            | 1.8               |

Table S1. Cont.

| Data Compilation: SiO <sub>2</sub> |           |                                                 |                                |          |            |              |                       |               |                   |
|------------------------------------|-----------|-------------------------------------------------|--------------------------------|----------|------------|--------------|-----------------------|---------------|-------------------|
| Ref.                               | Size (nm) | Origin of NM/Synthesis Method                   | Cells                          | Organism | Phagocytes | Pos. Control | Concentration (µg/mL) | Exp. Time (h) | Ratio ROS/Control |
| [10]                               | 19        | Jilin University                                | HepG2 hepatocellular carcinoma | human    | n          | y            | 100                   | 24            | 1.3               |
|                                    | 43        | Jilin University                                | HepG2 hepatocellular carcinoma | human    | n          | y            | 100                   | 24            | 1.1               |
|                                    | 68        | Jilin University                                | HepG2 hepatocellular carcinoma | human    | n          | y            | 100                   | 24            | 1.1               |
| [31]                               | 20        | East China University of Science and Technology | HEK293 embryonic kidney        | human    | n          | n            | 25                    | 24            | 1.3               |
|                                    |           |                                                 |                                |          |            |              | 50                    | 24            | 1.8               |
|                                    |           |                                                 |                                |          |            |              | 100                   | 24            | 2.3               |
|                                    | 50        | East China University of Science and Technology | HEK293 embryonic kidney        | human    | n          | n            | 25                    | 24            | 1.1               |
|                                    |           |                                                 |                                |          |            | 50           | 24                    | 1.4           |                   |
|                                    |           |                                                 |                                |          |            | 100          | 24                    | 2.2           |                   |
| Data Compilation: TiO <sub>2</sub> |           |                                                 |                                |          |            |              |                       |               |                   |
| Ref.                               | Size (nm) | Origin of NM/Synthesis Method                   | Cells                          | Organism | Phagocytes | Pos. Control | Concentration (µg/mL) | Exp. Time (h) | Ratio ROS/Control |
| [2]                                | 22        | Degussa                                         | Hepatocytes liver              | rat      | y          | y            | 0.384                 | 4             | 0.9               |
|                                    |           |                                                 |                                |          |            |              | 1.92                  | 4             | 0.7               |
|                                    |           |                                                 |                                |          |            |              | 9.6                   | 4             | 0.6               |
|                                    |           |                                                 |                                |          |            |              | 48                    | 4             | 0.6               |
|                                    |           |                                                 |                                |          |            |              | 240                   | 4             | 0.6               |
|                                    |           |                                                 |                                |          |            |              | 0.384                 | 24            | 0.4               |
|                                    |           |                                                 |                                |          |            |              | 1.92                  | 24            | 0.3               |
|                                    |           |                                                 |                                |          |            |              | 9.6                   | 24            | 0.3               |
|                                    |           |                                                 |                                |          |            |              | 48                    | 24            | 0.2               |
|                                    |           |                                                 |                                |          |            |              | 240                   | 24            | 0.3               |
| [39]                               | 21        |                                                 | PC12 pheochromocytoma          | rat      | n          | n            | 10                    | 24            | 1.2               |
|                                    |           |                                                 |                                |          |            |              | 50                    | 24            | 1.5               |
|                                    |           |                                                 |                                |          |            |              | 100                   | 24            | 1.8               |
|                                    |           |                                                 |                                |          |            |              | 30                    | 0.1           | 1.3               |

Table S1. Cont.

| Data Compilation: TiO <sub>2</sub> |           |                                                       |                              |          |            |              |                       |               |                   |
|------------------------------------|-----------|-------------------------------------------------------|------------------------------|----------|------------|--------------|-----------------------|---------------|-------------------|
| Ref.                               | Size (nm) | Origin of NM/Synthesis Method                         | Cells                        | Organism | Phagocytes | Pos. Control | Concentration (µg/mL) | Exp. Time (h) | Ratio ROS/Control |
|                                    |           |                                                       |                              |          |            |              | 15                    | 0.1           | 1.3               |
|                                    |           |                                                       |                              |          |            |              | 60                    | 0.1           | 1.7               |
|                                    |           |                                                       |                              |          |            |              | 120                   | 0.1           | 2.5               |
| [40]                               | 21        | Degussa Korea                                         | BEAS-2b bronchial epithelial | human    | n          | n            | 5                     | 24            | 1.2               |
|                                    |           |                                                       |                              |          |            |              | 10                    | 24            | 1.3               |
|                                    |           |                                                       |                              |          |            |              | 20                    | 24            | 1.5               |
|                                    |           |                                                       |                              |          |            |              | 40                    | 24            | 1.7               |
| [41]                               | 31        | Sonomechanical synthesis                              | WISH amnion epithelial       | human    | n          | y            | 0.625                 | 24            | 1                 |
|                                    |           |                                                       |                              |          |            |              | 1.25                  | 24            | 1                 |
|                                    |           |                                                       |                              |          |            |              | 2.5                   | 24            | 1                 |
|                                    |           |                                                       |                              |          |            |              | 5                     | 24            | 1.3               |
|                                    |           |                                                       |                              |          |            |              | 10                    | 24            | 1.9               |
| [42]                               | 50        | Sigma Chemical Co. Ltd.                               | A431 epidermal               | human    | n          | n            | 0.008                 | 6             | 1.2               |
|                                    |           |                                                       |                              |          |            |              | 0.08                  | 6             | 1.3               |
|                                    |           |                                                       |                              |          |            |              | 0.8                   | 6             | 1.5               |
|                                    |           |                                                       |                              |          |            |              | 8                     | 6             | 1.7               |
|                                    |           |                                                       |                              |          |            |              | 80                    | 6             | 1.8               |
| [44]                               | 35        | NanoAmor. Nanostructured and Amorphous Materials Inc. | THP-1 monocytic leukemia     | human    | y          | y            | 3                     | 3             | 0.4               |
|                                    |           |                                                       |                              |          |            |              | 30                    | 3             | 3.5               |
|                                    |           |                                                       |                              |          |            |              | 300                   | 3             | 3.4               |
| [47]                               | 11        | Flame spray pyrolysis (FSP)                           | BEAS-2b bronchial epithelial | human    | n          | n            | 10                    | 1             | 1.1               |
|                                    |           |                                                       |                              |          |            |              | 10                    | 3             | 0.9               |
|                                    |           |                                                       |                              |          |            |              | 10                    | 6             | 0.7               |
|                                    |           |                                                       |                              |          |            |              | 10                    | 16            | 1.1               |
|                                    |           |                                                       | RAW 264.7 macrophage         | mouse    | y          | n            | 10                    | 1             | 2.5               |

Table S1. Cont.

| Data Compilation: TiO <sub>2</sub> |           |                                        |                                            |          |            |              |                       |               |                   |
|------------------------------------|-----------|----------------------------------------|--------------------------------------------|----------|------------|--------------|-----------------------|---------------|-------------------|
| Ref.                               | Size (nm) | Origin of NM/Synthesis Method          | Cells                                      | Organism | Phagocytes | Pos. Control | Concentration (µg/mL) | Exp. Time (h) | Ratio ROS/Control |
|                                    |           |                                        |                                            |          |            |              | 10                    | 3             | 1.8               |
|                                    |           |                                        |                                            |          |            |              | 10                    | 6             | 1.3               |
|                                    |           |                                        |                                            |          |            |              | 10                    | 16            | 1.2               |
| [46]                               | 28        | INABTA and Co.                         | MPMVEC pulmonary microvascular endothelial | mouse    | n          | n            | 0.625                 | 12            | 1                 |
|                                    |           |                                        |                                            |          |            |              | 1.25                  | 12            | 1                 |
|                                    |           |                                        |                                            |          |            |              | 2.5                   | 12            | 1                 |
|                                    | 12        | Hangzhou Wanjingxin Material Co., Ltd. | Ana-1 macrophage                           | mouse    | y          | n            | 12.5                  | 24            | 1.3               |
|                                    |           |                                        |                                            |          |            |              | 25                    | 24            | 1.8               |
|                                    |           |                                        |                                            |          |            |              | 50                    | 24            | 2.5               |
|                                    |           |                                        |                                            |          |            |              | 100                   | 24            | 3.3               |
|                                    |           |                                        |                                            |          |            |              | 200                   | 24            | 4.2               |
|                                    |           |                                        |                                            |          |            |              | 400                   | 24            | 6.4               |
|                                    |           |                                        |                                            |          |            |              | 600                   | 24            | 7.5               |
| [11]                               | 21        | Hangzhou Wanjingxin Material Co., Ltd. | Ana-1 macrophage                           | mouse    | y          | n            | 12.5                  | 24            | 1.4               |
|                                    |           |                                        |                                            |          |            |              | 25                    | 24            | 2.1               |
|                                    |           |                                        |                                            |          |            |              | 50                    | 24            | 3.7               |
|                                    |           |                                        |                                            |          |            |              | 100                   | 24            | 5.7               |
|                                    |           |                                        |                                            |          |            |              | 200                   | 24            | 6.7               |
|                                    |           |                                        |                                            |          |            |              | 400                   | 24            | 9                 |
|                                    |           |                                        |                                            |          |            |              | 600                   | 24            | 12.2              |
|                                    | 98        | Hangzhou Wanjingxin Material Co., Ltd. | Ana-1 macrophage                           | mouse    | y          | n            | 12.5                  | 24            | 1.3               |
|                                    |           |                                        |                                            |          |            |              | 25                    | 24            | 1.9               |
|                                    |           |                                        |                                            |          |            |              | 50                    | 24            | 2.7               |
|                                    |           |                                        |                                            |          |            |              | 100                   | 24            | 3.5               |
|                                    |           |                                        |                                            |          |            |              | 200                   | 24            | 4                 |
|                                    |           |                                        |                                            |          |            |              | 400                   | 24            | 5.9               |

Table S1. Cont.

| Data Compilation: TiO <sub>2</sub> |           |                                        |                                          |          |            |              |                       |               |                   |
|------------------------------------|-----------|----------------------------------------|------------------------------------------|----------|------------|--------------|-----------------------|---------------|-------------------|
| Ref.                               | Size (nm) | Origin of NM/Synthesis Method          | Cells                                    | Organism | Phagocytes | Pos. Control | Concentration (µg/mL) | Exp. Time (h) | Ratio ROS/Control |
|                                    |           |                                        |                                          |          |            |              | 600                   | 24            | 6.8               |
|                                    |           |                                        |                                          |          |            |              | 12.5                  | 24            | 1.4               |
|                                    |           |                                        |                                          |          |            |              | 25                    | 24            | 1.6               |
|                                    | 148       | Hangzhou Wanjingxin Material Co., Ltd. | Ana-1 macrophage                         | mouse    | y          | n            | 50                    | 24            | 2.3               |
|                                    |           |                                        |                                          |          |            |              | 100                   | 24            | 2.5               |
|                                    |           |                                        |                                          |          |            |              | 200                   | 24            | 3.1               |
|                                    |           |                                        |                                          |          |            |              | 400                   | 24            | 3.8               |
|                                    |           |                                        |                                          |          |            |              | 600                   | 24            | 4.7               |
| [45]                               | 63        | Sigma-Aldrich                          | A549 lung adenocarcinoma epithelial cell | human    | n          | n            | 40                    | 4             | 1.4               |
|                                    |           |                                        |                                          |          |            |              | 80                    | 4             | 1.6               |
| Data Compilation: ZnO              |           |                                        |                                          |          |            |              |                       |               |                   |
| Ref.                               | Size (nm) | Origin of NM/Synthesis Method          | Cells                                    | Organism | Phagocytes | Pos. Control | Concentration (µg/mL) | Exp. Time (h) | Ratio ROS/Control |
|                                    |           |                                        |                                          |          |            |              | 5                     | 24            | 1.1               |
|                                    |           |                                        |                                          |          |            |              | 10                    | 24            | 1.3               |
|                                    |           |                                        |                                          |          |            |              | 25                    | 24            | 1.7               |
|                                    |           |                                        |                                          |          |            |              | 50                    | 24            | 2.0               |
| [51]                               | 50        | Sol-gel synthesis                      | A549 lung adenocarcinoma epithelial cell | human    | n          | n            | 100                   | 24            | 2.5               |
|                                    |           |                                        |                                          |          |            |              | 5                     | 48            | 1.1               |
|                                    |           |                                        |                                          |          |            |              | 10                    | 48            | 1.6               |
|                                    |           |                                        |                                          |          |            |              | 25                    | 48            | 1.8               |
|                                    |           |                                        |                                          |          |            |              | 50                    | 48            | 2.3               |
|                                    |           |                                        |                                          |          |            |              | 100                   | 48            | 2.9               |
| [52]                               | 17        | Sigma Aldrich                          | A375 malignant melanoma skin             | human    | n          | n            | 5                     | 24            | 1.1               |
|                                    |           |                                        |                                          |          |            |              | 10                    | 24            | 1.2               |
|                                    |           |                                        |                                          |          |            |              | 20                    | 24            | 1.6               |



Table S1. Cont.

| Data Compilation: ZnO |           |                               |                    |          |            |              |                       |               |                   |
|-----------------------|-----------|-------------------------------|--------------------|----------|------------|--------------|-----------------------|---------------|-------------------|
| Ref.                  | Size (nm) | Origin of NM/Synthesis Method | Cells              | Organism | Phagocytes | Pos. Control | Concentration (µg/mL) | Exp. Time (h) | Ratio ROS/Control |
|                       |           |                               |                    |          |            |              | 5                     | 48            | 1.2               |
|                       |           |                               |                    |          |            |              | 10                    | 48            | 1.4               |
|                       |           |                               |                    |          |            |              | 20                    | 48            | 1.8               |
|                       |           |                               |                    |          |            |              | 3.12                  | 24            | 1.2               |
|                       |           |                               |                    |          |            |              | 6.25                  | 24            | 1.3               |
|                       |           |                               |                    |          |            |              | 12.5                  | 24            | 1.4               |
|                       |           |                               | RTG-2 gonad tissue | fish     | n          | y            | 25                    | 24            | 1.5               |
|                       |           |                               |                    |          |            |              | 3.12                  | 48            | 1.1               |
|                       |           |                               |                    |          |            |              | 6.25                  | 48            | 1.2               |
|                       |           |                               |                    |          |            |              | 12.5                  | 48            | 1.4               |
|                       |           |                               |                    |          |            |              | 25                    | 48            | 1.5               |
|                       |           |                               |                    |          |            |              | 3.12                  | 24            | 1.1               |
|                       |           |                               |                    |          |            |              | 6.25                  | 24            | 1.3               |
|                       |           |                               |                    |          |            |              | 12.5                  | 24            | 1.4               |
| [78]                  | 58        | Sigma Aldrich                 | RTH-149 epithelial | fish     | n          | y            | 25                    | 24            | 1.4               |
|                       |           |                               |                    |          |            |              | 3.12                  | 48            | 1.2               |
|                       |           |                               |                    |          |            |              | 6.25                  | 48            | 1.4               |
|                       |           |                               |                    |          |            |              | 12.5                  | 48            | 1.5               |
|                       |           |                               |                    |          |            |              | 25                    | 48            | 1.6               |
|                       |           |                               |                    |          |            |              | 3.12                  | 24            | 1.4               |
|                       |           |                               |                    |          |            |              | 6.25                  | 24            | 1.5               |
|                       |           |                               |                    |          |            |              | 12.5                  | 24            | 1.5               |
|                       |           |                               | RTL-W1 liver       | fish     | n          | y            | 25                    | 24            | 1.6               |
|                       |           |                               |                    |          |            |              | 3.12                  | 48            | 1.4               |
|                       |           |                               |                    |          |            |              | 6.25                  | 48            | 1.5               |
|                       |           |                               |                    |          |            |              | 12.5                  | 48            | 1.6               |

Table S1. Cont.

| Data Compilation: ZnO |           |                                        |                                             |          |            |              |                       |               |                   |
|-----------------------|-----------|----------------------------------------|---------------------------------------------|----------|------------|--------------|-----------------------|---------------|-------------------|
| Ref.                  | Size (nm) | Origin of NM/Synthesis Method          | Cells                                       | Organism | Phagocytes | Pos. Control | Concentration (µg/mL) | Exp. Time (h) | Ratio ROS/Control |
| [54]                  | 20        | Nanostructured and Amorphous Materials | BEAS-2b bronchial epithelial                | human    | n          | n            | 25                    | 48            | 1.6               |
|                       |           |                                        |                                             |          |            |              | 5                     | 6             | 1.4               |
|                       |           |                                        |                                             |          |            |              | 6                     | 6             | 2.0               |
|                       |           |                                        |                                             |          |            |              | 7                     | 6             | 2.2               |
|                       |           |                                        |                                             |          |            |              | 8                     | 6             | 3.2               |
|                       |           |                                        |                                             |          |            |              | 9                     | 6             | 3.8               |
|                       |           |                                        |                                             |          |            |              | 10                    | 6             | 4.0               |
|                       |           |                                        |                                             |          |            |              | 5                     | 24            | 1.3               |
|                       |           |                                        |                                             |          |            |              | 6                     | 24            | 1.4               |
|                       |           |                                        |                                             |          |            |              | 7                     | 24            | 1.9               |
| 8                     | 24        | 4.1                                    |                                             |          |            |              |                       |               |                   |
| 9                     | 24        | 7.4                                    |                                             |          |            |              |                       |               |                   |
| 10                    | 24        | 11.6                                   |                                             |          |            |              |                       |               |                   |
| [79]                  | 10        | IBU-tec advanced materials AG          | Jurkat A3 leukemic T cell                   | human    | n          | y            | 1                     | 2             | 1.0               |
|                       |           |                                        |                                             |          |            |              | 5                     | 2             | 1.0               |
|                       |           |                                        |                                             |          |            |              | 10                    | 2             | 1.0               |
|                       |           |                                        |                                             |          |            |              | 50                    | 2             | 1.7               |
|                       |           |                                        |                                             |          |            |              | 100                   | 2             | 2.1               |
| [80]                  | 155       | Hydrothermal method                    | hPDLF peridontal ligament fibroblast tissue | human    | n          | y            | 0.1                   | 0.5           | 1.0               |
|                       |           |                                        |                                             |          |            |              | 1                     | 0.5           | 1.1               |
|                       |           |                                        |                                             |          |            |              | 10                    | 0.5           | 1.1               |
|                       |           |                                        | 50                                          | 0.5      | 1.3        |              |                       |               |                   |
|                       |           |                                        | 100                                         | 0.5      | 1.3        |              |                       |               |                   |
|                       |           |                                        | mDF dermal fibroblast                       | mouse    | n          | y            | 0.1                   | 0.5           | 1.0               |
| 1                     | 0.5       | 1.1                                    |                                             |          |            |              |                       |               |                   |
| 10                    | 0.5       | 1.2                                    |                                             |          |            |              |                       |               |                   |

Table S1. Cont.

| Data Compilation: ZnO |           |                                    |                                    |          |            |              |                       |               |                   |
|-----------------------|-----------|------------------------------------|------------------------------------|----------|------------|--------------|-----------------------|---------------|-------------------|
| Ref.                  | Size (nm) | Origin of NM/Synthesis Method      | Cells                              | Organism | Phagocytes | Pos. Control | Concentration (µg/mL) | Exp. Time (h) | Ratio ROS/Control |
|                       |           |                                    |                                    |          |            |              | 50                    | 0.5           | 1.3               |
|                       |           |                                    |                                    |          |            |              | 100                   | 0.5           | 1.3               |
|                       |           |                                    |                                    |          |            |              | 0.5                   | 5             | 1.0               |
|                       |           |                                    |                                    |          |            |              | 1                     | 5             | 1.1               |
|                       |           |                                    |                                    |          |            |              | 2                     | 5             | 1.2               |
|                       |           |                                    | BJ shp53 (knockdown)               | human    | n          | n            | 4                     | 5             | 1.4               |
|                       |           |                                    |                                    |          |            |              | 8                     | 5             | 1.6               |
|                       |           |                                    |                                    |          |            |              | 12                    | 5             | 1.8               |
|                       |           |                                    |                                    |          |            |              | 16                    | 5             | 2.1               |
| [81]                  | 31        | Sigma Aldrich                      |                                    |          |            |              | 20                    | 5             | 2.5               |
|                       |           |                                    |                                    |          |            |              | 0.5                   | 5             | 1.0               |
|                       |           |                                    |                                    |          |            |              | 1                     | 5             | 1.0               |
|                       |           |                                    |                                    |          |            |              | 2                     | 5             | 1.0               |
|                       |           |                                    | BJ WT neonatal foreskin fibroblast | human    | n          | n            | 4                     | 5             | 1.0               |
|                       |           |                                    |                                    |          |            |              | 8                     | 5             | 1.3               |
|                       |           |                                    |                                    |          |            |              | 12                    | 5             | 1.7               |
|                       |           |                                    |                                    |          |            |              | 16                    | 5             | 2.2               |
|                       |           |                                    |                                    |          |            |              | 20                    | 5             | 3.0               |
|                       |           |                                    |                                    |          |            |              | 5                     | 24            | 0.5               |
|                       |           |                                    |                                    |          |            |              | 10                    | 24            | 0.8               |
| [50]                  | 19        | Shenzhen Nanuo Nanomaterials Corp. | Ana-1 macrophage                   | mouse    | y          | n            | 20                    | 24            | 1.5               |
|                       |           |                                    |                                    |          |            |              | 40                    | 24            | 2.3               |
|                       |           |                                    |                                    |          |            |              | 80                    | 24            | 3.2               |
|                       |           |                                    |                                    |          |            |              | 100                   | 24            | 3.8               |

Table S1. Cont.

| Data Compilation: ZnO |           |                                        |                                         |          |            |              |                       |               |                   |
|-----------------------|-----------|----------------------------------------|-----------------------------------------|----------|------------|--------------|-----------------------|---------------|-------------------|
| Ref.                  | Size (nm) | Origin of NM/Synthesis Method          | Cells                                   | Organism | Phagocytes | Pos. Control | Concentration (µg/mL) | Exp. Time (h) | Ratio ROS/Control |
| 71                    |           | Beijing Nachen Technology Co., Ltd.    | Ana-1 macrophage                        | mouse    | y          | n            | 5                     | 24            | 0.6               |
|                       |           |                                        |                                         |          |            |              | 10                    | 24            | 0.7               |
|                       |           |                                        |                                         |          |            |              | 20                    | 24            | 0.9               |
|                       |           |                                        |                                         |          |            |              | 40                    | 24            | 1.2               |
|                       |           |                                        |                                         |          |            |              | 80                    | 24            | 2.2               |
|                       |           |                                        |                                         |          |            |              | 100                   | 24            | 2.7               |
| 108                   |           | Beijing Nachen Technology Co., Ltd.    | Ana-1 macrophage                        | mouse    | y          | n            | 5                     | 24            | 0.5               |
|                       |           |                                        |                                         |          |            |              | 10                    | 24            | 0.6               |
|                       |           |                                        |                                         |          |            |              | 20                    | 24            | 0.9               |
|                       |           |                                        |                                         |          |            |              | 40                    | 24            | 1.4               |
|                       |           |                                        |                                         |          |            |              | 80                    | 24            | 2.4               |
|                       |           |                                        |                                         |          |            |              | 100                   | 24            | 2.8               |
| 342                   |           | Hangzhou Wanjingxin Material Co., Ltd. | Ana-1 macrophage                        | mouse    | y          | n            | 5                     | 24            | 0.4               |
|                       |           |                                        |                                         |          |            |              | 10                    | 24            | 0.6               |
|                       |           |                                        |                                         |          |            |              | 20                    | 24            | 1.0               |
|                       |           |                                        |                                         |          |            |              | 40                    | 24            | 1.7               |
|                       |           |                                        |                                         |          |            |              | 80                    | 24            | 2.6               |
|                       |           |                                        |                                         |          |            |              | 100                   | 24            | 3.0               |
| [82]                  | 45        | Sigma-Aldrich                          | HCMEC cardiac microvascular endothelial | human    | n          | n            | 0.001                 | 12            | 0.9               |
|                       |           |                                        |                                         |          |            |              | 0.01                  | 12            | 1.2               |
|                       |           |                                        |                                         |          |            |              | 0.1                   | 12            | 1.0               |
|                       |           |                                        |                                         |          |            |              | 1                     | 12            | 1.2               |
|                       |           |                                        |                                         |          |            |              | 5                     | 12            | 1.3               |
|                       |           |                                        |                                         |          |            |              | 10                    | 12            | 1.6               |
| 20                    | 12        | 3.3                                    |                                         |          |            |              |                       |               |                   |

Table S1. Cont.

| Data Compilation: ZnO |           |                               |                              |          |            |              |                       |               |                   |
|-----------------------|-----------|-------------------------------|------------------------------|----------|------------|--------------|-----------------------|---------------|-------------------|
| Ref.                  | Size (nm) | Origin of NM/Synthesis Method | Cells                        | Organism | Phagocytes | Pos. Control | Concentration (µg/mL) | Exp. Time (h) | Ratio ROS/Control |
|                       |           |                               |                              |          |            |              | 50                    | 12            | 4.3               |
|                       |           |                               |                              |          |            |              | 100                   | 12            | 5.2               |
|                       |           |                               |                              |          |            |              | 0.001                 | 24            | 1.0               |
|                       |           |                               |                              |          |            |              | 0.01                  | 24            | 1.2               |
|                       |           |                               |                              |          |            |              | 0.1                   | 24            | 1.0               |
|                       |           |                               |                              |          |            |              | 1                     | 24            | 1.0               |
|                       |           |                               |                              |          |            |              | 5                     | 24            | 3.4               |
|                       |           |                               |                              |          |            |              | 10                    | 24            | 4.3               |
|                       |           |                               |                              |          |            |              | 20                    | 24            | 6.4               |
|                       |           |                               |                              |          |            |              | 50                    | 24            | 7.3               |
|                       |           |                               |                              |          |            |              | 100                   | 24            | 7.1               |
|                       |           |                               |                              |          |            |              | 4                     | 6             | 1.2               |
|                       |           |                               |                              |          |            |              | 8                     | 6             | 1.4               |
|                       |           |                               |                              |          |            |              | 12                    | 6             | 2.1               |
| [53]                  | 45        | HAT Nano Company              | astrocytes                   | rat      | n          | n            | 4                     | 12            | 0.9               |
|                       |           |                               |                              |          |            |              | 8                     | 12            | 1.0               |
|                       |           |                               |                              |          |            |              | 12                    | 12            | 2.2               |
|                       |           |                               |                              |          |            |              | 4                     | 24            | 1.0               |
|                       |           |                               |                              |          |            |              | 8                     | 24            | 1.0               |
|                       |           |                               |                              |          |            |              | 12                    | 24            | 1.1               |
|                       |           |                               |                              |          |            |              | 10                    | 1             | 0.9               |
| [47]                  | 13        | Flame spray pyrolysis (FSP)   | BEAS-2b bronchial epithelial | human    | n          | n            | 10                    | 3             | 0.7               |
|                       |           |                               |                              |          |            |              | 10                    | 6             | 0.7               |
|                       |           |                               |                              |          |            |              | 10                    | 16            | 0.0               |
|                       |           |                               | RAW 264.7                    | mouse    | y          | n            | 10                    | 1             | 6.7               |

Table S1. Cont.

| Data Compilation: ZnO |           |                               |                                             |          |            |              |                       |               |                   |
|-----------------------|-----------|-------------------------------|---------------------------------------------|----------|------------|--------------|-----------------------|---------------|-------------------|
| Ref.                  | Size (nm) | Origin of NM/Synthesis Method | Cells                                       | Organism | Phagocytes | Pos. Control | Concentration (µg/mL) | Exp. Time (h) | Ratio ROS/Control |
|                       |           |                               |                                             |          |            |              | 10                    | 3             | 6.5               |
|                       |           |                               |                                             |          |            |              | 10                    | 6             | 4.7               |
|                       |           |                               |                                             |          |            |              | 10                    | 16            | 2.6               |
|                       |           |                               |                                             |          |            |              | 5                     | 24            | 1.3               |
| [64]                  | 20        | Nanuo Co., Ltd.               | Primary embryo fibroblasts                  | mouse    | n          | n            | 10                    | 24            | 2.3               |
|                       |           |                               |                                             |          |            |              | 20                    | 24            | 3.0               |
|                       |           |                               |                                             |          |            |              | 50                    | 24            | 4.9               |
|                       |           |                               |                                             |          |            |              | 100                   | 24            | 4.9               |
| [83]                  | 30        | Sigma Chemical Co., Ltd.      | HepG2 hepatocellular carcinoma              | human    | n          | n            | 8                     | 6             | 1.0               |
|                       |           |                               |                                             |          |            |              | 14                    | 6             | 1.2               |
|                       |           |                               |                                             |          |            |              | 20                    | 6             | 1.3               |
|                       |           |                               |                                             |          |            |              | 10                    | 24            | 2.3               |
| [84]                  | 90        | Hangzhou Wan Jing New Ltd.    | Caco-2 epithelial colorectal adenocarcinoma | human    | n          | n            | 25                    | 24            | 2.3               |
|                       |           |                               |                                             |          |            |              | 50                    | 24            | 2.3               |
|                       |           |                               |                                             |          |            |              | 100                   | 24            | 2.3               |
|                       |           |                               |                                             |          |            |              | 200                   | 24            | 2.3               |
| [85]                  | 22        | Coprecipitation synthesis     | HepG2 hepatocellular carcinoma              | human    | n          | n            | 15                    | 24            | 1.5               |
| [45]                  | 71        | Sigma-Aldrich                 | A549 lung adenocarcinoma epithelial cell    | human    | n          | n            | 40                    | 4             | 1.1               |
|                       |           |                               |                                             |          |            |              | 80                    | 4             | 1.3               |
|                       |           |                               |                                             |          |            |              | 10                    | 48            | 1.2               |
|                       |           |                               |                                             |          |            |              | 20                    | 48            | 1.3               |
| [86]                  | 35        | Chemical pyrolysis            | 3T3-L1 preadipocytes                        | mouse    | n          | n            | 30                    | 48            | 1.5               |
|                       |           |                               |                                             |          |            |              | 40                    | 48            | 1.6               |
|                       |           |                               |                                             |          |            |              | 50                    | 48            | 1.8               |
|                       |           |                               |                                             |          |            |              | 60                    | 48            | 1.9               |

Table S1. Cont.

| Data Compilation: ZnO |           |                               |                                          |          |            |              |                       |               |                   |
|-----------------------|-----------|-------------------------------|------------------------------------------|----------|------------|--------------|-----------------------|---------------|-------------------|
| Ref.                  | Size (nm) | Origin of NM/Synthesis Method | Cells                                    | Organism | Phagocytes | Pos. Control | Concentration (µg/mL) | Exp. Time (h) | Ratio ROS/Control |
|                       |           |                               |                                          |          |            |              | 70                    | 48            | 2.1               |
|                       |           |                               |                                          |          |            |              | 80                    | 48            | 2.2               |
| Data Compilation: CuO |           |                               |                                          |          |            |              |                       |               |                   |
| Ref.                  | Size (nm) | Origin of NM/Synthesis Method | Cells                                    | Organism | Phagocytes | Pos. Control | Concentration (µg/mL) | Exp. Time (h) | Ratio ROS/Control |
| [87]                  | 26        | Aquaeous precipitation        | BALB3T3 embryonic fibroblasts            | mouse    | n          | n            | 5                     | 48            | 1.3               |
|                       |           |                               |                                          |          |            |              | 10                    | 48            | 1.6               |
|                       |           |                               |                                          |          |            |              | 15                    | 48            | 1.8               |
| [55]                  | 30        | Alfa Aesar                    | Hep-2 laryngeal epithelial               | human    | n          | n            | 125                   | 0.5           | 1.3               |
| [45]                  | 42        | Sigma-Aldrich                 | A549 lung adenocarcinoma epithelial cell | human    | n          | n            | 40                    | 4             | 1.4               |
|                       |           |                               |                                          |          |            |              | 80                    | 4             | 2.1               |
| [88]                  | 180       | Sigma Aldrich                 | BEAS-2b bronchial epithelial             | human    | n          | n            | 0.1                   | 3             | 1.2               |
|                       |           |                               |                                          |          |            |              | 0.2                   | 3             | 1.3               |
|                       |           |                               |                                          |          |            |              | 6.4                   | 3             | 1.4               |
|                       |           |                               |                                          |          |            |              | 3.2                   | 3             | 1.4               |
|                       |           |                               |                                          |          |            |              | 0.4                   | 3             | 1.5               |
|                       |           |                               |                                          |          |            |              | 0.8                   | 3             | 1.6               |
|                       |           |                               |                                          |          |            |              | 1.6                   | 3             | 1.6               |
| [82]                  | 46        | Sigma-Aldrich                 | HCMEC cardiac microvascular endothelial  | human    | n          | n            | 0.001                 | 12            | 1                 |
|                       |           |                               |                                          |          |            |              | 0.01                  | 12            | 1.2               |
|                       |           |                               |                                          |          |            |              | 0.1                   | 12            | 1.2               |
|                       |           |                               |                                          |          |            |              | 1                     | 12            | 1.3               |
|                       |           |                               |                                          |          |            |              | 5                     | 12            | 1.5               |
|                       |           |                               |                                          |          |            |              | 10                    | 12            | 1.8               |
|                       |           |                               |                                          |          |            |              | 20                    | 12            | 2.8               |

Table S1. Cont.

| Data Compilation: CuO |           |                               |                                            |          |            |              |                       |               |                   |
|-----------------------|-----------|-------------------------------|--------------------------------------------|----------|------------|--------------|-----------------------|---------------|-------------------|
| Ref.                  | Size (nm) | Origin of NM/Synthesis Method | Cells                                      | Organism | Phagocytes | Pos. Control | Concentration (µg/mL) | Exp. Time (h) | Ratio ROS/Control |
|                       |           |                               |                                            |          |            |              | 50                    | 12            | 4.6               |
|                       |           |                               |                                            |          |            |              | 100                   | 12            | 4.8               |
|                       |           |                               |                                            |          |            |              | 0.01                  | 24            | 0.9               |
|                       |           |                               |                                            |          |            |              | 0.1                   | 24            | 1                 |
|                       |           |                               |                                            |          |            |              | 0.001                 | 24            | 1.2               |
|                       |           |                               |                                            |          |            |              | 1                     | 24            | 1.2               |
|                       |           |                               |                                            |          |            |              | 5                     | 24            | 2.1               |
|                       |           |                               |                                            |          |            |              | 10                    | 24            | 3.1               |
|                       |           |                               |                                            |          |            |              | 20                    | 24            | 6.1               |
|                       |           |                               |                                            |          |            |              | 50                    | 24            | 7.3               |
|                       |           |                               |                                            |          |            |              | 100                   | 24            | 7                 |
| [56]                  | 50        | Sigma Aldrich                 | J774.A1 macrophage                         | mouse    | y          | n            | 2.5                   | 0.5           | 1                 |
|                       |           |                               |                                            |          |            |              | 5                     | 0.5           | 1.8               |
|                       |           |                               |                                            |          |            |              | 10                    | 0.5           | 3.6               |
| [89]                  | 15        | University of Hertfordshire   | podocytes                                  | mouse    | n          | n            | 1                     | 0.5           | 1.1               |
|                       |           |                               |                                            |          |            |              | 10                    | 0.5           | 1.3               |
|                       |           |                               |                                            |          |            |              | 30                    | 0.5           | 1.5               |
| [46]                  | 42        | Sigma-Aldrich                 | MPMVEC pulmonary microvascular endothelial | mouse    | n          | n            | 0.625                 | 12            | 1.4               |
|                       |           |                               |                                            |          |            |              | 1.25                  | 12            | 1.8               |
|                       |           |                               |                                            |          |            |              | 2.5                   | 12            | 2.1               |



Table S1. Cont.

| Data Compilation: CeO <sub>2</sub> |                              |                                                   |                                          |          |            |              |                       |               |                   |
|------------------------------------|------------------------------|---------------------------------------------------|------------------------------------------|----------|------------|--------------|-----------------------|---------------|-------------------|
| Ref.                               | Size (nm)                    | Origin of NM/Synthesis Method                     | Cells                                    | Organism | Phagocytes | Pos. Control | Concentration (µg/mL) | Exp. Time (h) | Ratio ROS/Control |
| [58]                               | 14                           | C.I. Kasei Company Ltd./physical vapour synthesis | HaCaT epidermal keratinocyte             | human    | n          | n            | 100                   | 2             | 0.7               |
|                                    |                              |                                                   |                                          |          |            |              | 100                   | 6             | 0.6               |
|                                    |                              |                                                   |                                          |          |            |              | 100                   | 12            | 0.6               |
|                                    |                              |                                                   |                                          |          |            |              | 100                   | 24            | 0.8               |
|                                    |                              |                                                   |                                          |          |            |              | 200                   | 2             | 0.8               |
|                                    |                              |                                                   |                                          |          |            |              | 200                   | 6             | 0.6               |
|                                    |                              |                                                   |                                          |          |            |              | 200                   | 12            | 0.9               |
|                                    |                              |                                                   |                                          |          |            |              | 200                   | 24            | 1.5               |
|                                    |                              |                                                   | A549 lung adenocarcinoma epithelial cell | human    | n          | n            | 100                   | 2             | 0.8               |
|                                    |                              |                                                   |                                          |          |            |              | 100                   | 6             | 0.6               |
|                                    |                              |                                                   |                                          |          |            |              | 100                   | 12            | 0.7               |
|                                    |                              |                                                   |                                          |          |            |              | 100                   | 24            | 0.5               |
|                                    |                              |                                                   |                                          |          |            |              | 200                   | 2             | 0.8               |
|                                    |                              |                                                   |                                          |          |            |              | 200                   | 6             | 1.0               |
| 400                                | Junsei Chemical Company Ltd. | HaCaT epidermal keratinocyte                      | human                                    | n        | n          | 200          | 12                    | 0.9           |                   |
|                                    |                              |                                                   |                                          |          |            | 200          | 24                    | 0.9           |                   |
|                                    |                              |                                                   |                                          |          |            | 200          | 2                     | 1.1           |                   |
|                                    |                              |                                                   |                                          |          |            | 200          | 6                     | 0.9           |                   |
|                                    |                              |                                                   |                                          |          |            | 200          | 12                    | 1.4           |                   |
|                                    |                              |                                                   |                                          |          |            | 200          | 24                    | 1.3           |                   |

Table S1. Cont.

| Data Compilation: CeO <sub>2</sub> |           |                                                                         |                                                           |          |            |              |                       |               |                   |
|------------------------------------|-----------|-------------------------------------------------------------------------|-----------------------------------------------------------|----------|------------|--------------|-----------------------|---------------|-------------------|
| Ref.                               | Size (nm) | Origin of NM/Synthesis Method                                           | Cells                                                     | Organism | Phagocytes | Pos. Control | Concentration (µg/mL) | Exp. Time (h) | Ratio ROS/Control |
|                                    |           |                                                                         | A549 lung adenocarcinoma epithelial cell                  | human    | n          | n            | 100                   | 2             | 1.2               |
|                                    |           |                                                                         |                                                           |          |            |              | 100                   | 6             | 0.8               |
|                                    |           |                                                                         |                                                           |          |            |              | 100                   | 12            | 0.9               |
|                                    |           |                                                                         |                                                           |          |            |              | 100                   | 24            | 0.9               |
|                                    |           |                                                                         |                                                           |          |            |              | 200                   | 2             | 0.7               |
|                                    |           |                                                                         |                                                           |          |            |              | 200                   | 6             | 0.8               |
|                                    |           |                                                                         |                                                           |          |            |              | 200                   | 12            | 1.0               |
|                                    |           |                                                                         |                                                           |          |            |              | 200                   | 24            | 1.1               |
|                                    |           |                                                                         |                                                           |          |            |              | 5                     | 24            | 1.1               |
| [59]                               | 30        | Supercritical synthesis                                                 | BEAS-2b bronchial epithelial                              | human    | n          | n            | 10                    | 24            | 1.2               |
|                                    |           |                                                                         |                                                           |          |            |              | 20                    | 24            | 1.3               |
|                                    |           |                                                                         |                                                           |          |            |              | 40                    | 24            | 1.4               |
| [90]                               | 12        | Mixing of Ce(NO <sub>3</sub> ) <sub>3</sub> ·6H <sub>2</sub> O with HMT | HT22 hippocampal nerve cell line                          | mouse    | n          | y            | 20                    | 0.2           | 0.6               |
|                                    |           |                                                                         |                                                           |          |            |              | 20                    | 0.5           | 0.7               |
|                                    |           |                                                                         |                                                           |          |            |              | 20                    | 1             | 0.5               |
|                                    | 7         | Flame spray pyrolysis                                                   | U937 leukemic monocyte lymphoma cell line                 | human    | y          | n            | 50                    | 24            | 0.8               |
|                                    |           |                                                                         |                                                           |          |            |              | 50                    | 48            | 0.4               |
|                                    |           |                                                                         |                                                           |          |            |              | 50                    | 72            | 0.9               |
| [7]                                |           |                                                                         | U937 (PMA activated) leukemic monocyte lymphoma cell line | human    | y          | n            | 50                    | 24            | 0.9               |
|                                    |           |                                                                         |                                                           |          |            |              | 50                    | 48            | 0.6               |
|                                    |           |                                                                         |                                                           |          |            |              | 50                    | 72            | 0.8               |
|                                    | 14        | Flame spray pyrolysis                                                   | U937 leukemic monocyte lymphoma cell line                 | human    | y          | n            | 50                    | 24            | 0.6               |
|                                    |           |                                                                         |                                                           |          |            |              | 50                    | 48            | 0.4               |
|                                    |           |                                                                         |                                                           |          |            |              | 50                    | 72            | 0.8               |

Table S1. Cont.

| Data Compilation: CeO <sub>2</sub> |           |                               |                      |          |                          |                                          |                       |               |                   |    |   |     |
|------------------------------------|-----------|-------------------------------|----------------------|----------|--------------------------|------------------------------------------|-----------------------|---------------|-------------------|----|---|-----|
| Ref.                               | Size (nm) | Origin of NM/Synthesis Method | Cells                | Organism | Phagocytes               | Pos. Control                             | Concentration (µg/mL) | Exp. Time (h) | Ratio ROS/Control |    |   |     |
| 94                                 |           | Flame spray pyrolysis         | U937 (PMA activated) | human    | y                        | n                                        | 50                    | 24            | 0.8               |    |   |     |
|                                    |           |                               | leukemic monocyte    |          |                          |                                          | 50                    | 48            | 0.4               |    |   |     |
|                                    |           |                               | lymphoma cell line   |          |                          |                                          | 50                    | 72            | 0.6               |    |   |     |
|                                    |           |                               | U937 leukemic        | human    | y                        | n                                        | 50                    | 24            | 0.6               |    |   |     |
|                                    |           |                               | monocyte lymphoma    |          |                          |                                          | 50                    | 48            | 0.6               |    |   |     |
|                                    |           |                               | cell line            |          |                          |                                          | 50                    | 72            | 0.7               |    |   |     |
|                                    |           |                               | U937 (PMA activated) | human    | y                        | n                                        | 50                    | 24            | 0.9               |    |   |     |
|                                    |           |                               | leukemic monocyte    |          |                          |                                          | 50                    | 48            | 0.7               |    |   |     |
|                                    |           |                               | lymphoma cell line   |          |                          |                                          | 50                    | 72            | 0.7               |    |   |     |
|                                    |           |                               | [90]                 | 20       | Sigma Chemical Co., Ltd. | A549 lung adenocarcinoma epithelial cell | human                 | n             | y                 | 1  | 3 | 1.0 |
|                                    |           |                               |                      |          |                          |                                          |                       |               |                   | 10 | 3 | 1.4 |
|                                    |           |                               |                      |          |                          |                                          |                       |               |                   | 25 | 3 | 1.7 |
| 50                                 | 3         | 2.0                           |                      |          |                          |                                          |                       |               |                   |    |   |     |
| 100                                | 3         | 2.6                           |                      |          |                          |                                          |                       |               |                   |    |   |     |
| 1                                  | 6         | 1.1                           |                      |          |                          |                                          |                       |               |                   |    |   |     |
| 10                                 | 6         | 2.1                           |                      |          |                          |                                          |                       |               |                   |    |   |     |
| 25                                 | 6         | 2.4                           |                      |          |                          |                                          |                       |               |                   |    |   |     |
| 50                                 | 6         | 2.7                           |                      |          |                          |                                          |                       |               |                   |    |   |     |
| 100                                | 6         | 2.9                           |                      |          |                          |                                          |                       |               |                   |    |   |     |
| 1                                  | 24        | 0.9                           |                      |          |                          |                                          |                       |               |                   |    |   |     |
| 10                                 | 24        | 0.9                           |                      |          |                          |                                          |                       |               |                   |    |   |     |
| 25                                 | 24        | 1.2                           |                      |          |                          |                                          |                       |               |                   |    |   |     |
| 50                                 | 24        | 1.2                           |                      |          |                          |                                          |                       |               |                   |    |   |     |
| 100                                | 24        | 1.1                           |                      |          |                          |                                          |                       |               |                   |    |   |     |

Table S1. Cont.

| Data Compilation: CeO <sub>2</sub> |           |                                            |                                                           |          |            |              |                       |               |                   |
|------------------------------------|-----------|--------------------------------------------|-----------------------------------------------------------|----------|------------|--------------|-----------------------|---------------|-------------------|
| Ref.                               | Size (nm) | Origin of NM/Synthesis Method              | Cells                                                     | Organism | Phagocytes | Pos. Control | Concentration (µg/mL) | Exp. Time (h) | Ratio ROS/Control |
| [47]                               | 8         | Flame spray pyrolysis (FSP)                | BEAS-2b bronchial epithelial                              | human    | n          | n            | 10                    | 1             | 1.1               |
|                                    |           |                                            |                                                           |          |            |              | 10                    | 3             | 1.1               |
|                                    |           |                                            |                                                           |          |            |              | 10                    | 6             | 1.0               |
|                                    |           |                                            |                                                           |          |            |              | 10                    | 16            | 0.9               |
|                                    |           |                                            | RAW 264.7 macrophages                                     | mouse    | y          | n            | 10                    | 1             | 2.1               |
|                                    |           |                                            |                                                           |          |            |              | 10                    | 3             | 2.1               |
|                                    |           |                                            |                                                           |          |            |              | 10                    | 6             | 1.8               |
|                                    |           |                                            |                                                           |          |            |              | 10                    | 16            | 1.2               |
| [60]                               | 7         | Flame spray pyrolysis                      | U937 leukemic monocyte lymphoma cell line                 | human    | y          | n            | 50                    | 24            | 0.9               |
|                                    |           |                                            |                                                           |          |            |              | 200                   | 24            | 0.8               |
|                                    |           |                                            |                                                           |          |            |              | 50                    | 48            | 0.8               |
|                                    |           |                                            |                                                           |          |            |              | 200                   | 48            | 0.6               |
|                                    |           |                                            |                                                           |          |            |              | 50                    | 72            | 0.8               |
|                                    |           |                                            | 200                                                       | 72       | 0.7        |              |                       |               |                   |
|                                    |           |                                            | U937 (PMA activated) leukemic monocyte lymphoma cell line | human    | y          | n            | 50                    | 24            | 0.9               |
|                                    |           |                                            |                                                           |          |            |              | 200                   | 24            | 0.8               |
|                                    |           |                                            |                                                           |          |            |              | 50                    | 48            | 0.7               |
|                                    |           |                                            |                                                           |          |            |              | 200                   | 48            | 0.6               |
| 50                                 | 72        | 0.9                                        |                                                           |          |            |              |                       |               |                   |
| 200                                | 72        | 0.7                                        |                                                           |          |            |              |                       |               |                   |
| [91]                               | 10        | Wet-chemical synthesis at room temperature | Jurkat tumour T lymphocytes                               | human    | n          | y            | 200                   | 1             | 0.9               |
|                                    |           |                                            |                                                           |          |            |              | 200                   | 3             | 0.9               |
|                                    |           |                                            |                                                           |          |            |              | 200                   | 24            | 0.8               |
|                                    |           |                                            |                                                           |          |            |              | 200                   | 48            | 0.6               |
|                                    |           |                                            |                                                           |          |            |              | 200                   | 72            | 0.5               |

Table S1. Cont.

| Data Compilation: CeO <sub>2</sub> |                 |                               |                                          |          |            |              |                       |               |                   |
|------------------------------------|-----------------|-------------------------------|------------------------------------------|----------|------------|--------------|-----------------------|---------------|-------------------|
| Ref.                               | Size (nm)       | Origin of NM/Synthesis Method | Cells                                    | Organism | Phagocytes | Pos. Control | Concentration (µg/mL) | Exp. Time (h) | Ratio ROS/Control |
|                                    |                 |                               |                                          |          |            |              | 5                     | 1             | 1.0               |
|                                    |                 |                               |                                          |          |            |              | 20                    | 1             | 0.9               |
|                                    |                 |                               |                                          |          |            |              | 100                   | 1             | 0.9               |
|                                    |                 |                               |                                          |          |            |              | 200                   | 1             | 0.8               |
|                                    |                 |                               |                                          |          |            |              | 200                   | 3             | 0.8               |
|                                    |                 |                               | U937 tumour monocytes                    | human    | y          | y            | 5                     | 6             | 0.9               |
|                                    |                 |                               |                                          |          |            |              | 20                    | 6             | 0.8               |
|                                    |                 |                               |                                          |          |            |              | 100                   | 6             | 0.8               |
|                                    |                 |                               |                                          |          |            |              | 200                   | 6             | 0.7               |
|                                    |                 |                               |                                          |          |            |              | 200                   | 6             | 0.8               |
|                                    |                 |                               |                                          |          |            |              | 200                   | 24            | 0.6               |
|                                    |                 |                               |                                          |          |            |              | 200                   | 48            | 0.4               |
|                                    |                 |                               |                                          |          |            |              | 200                   | 72            | 0.4               |
| Data Compilation: CNT              |                 |                               |                                          |          |            |              |                       |               |                   |
| Ref.                               | Size (nm)       | Origin of NM/Synthesis Method | Cells                                    | Organism | Phagocytes | Pos. Control | Concentration (µg/mL) | Exp. Time (h) | Ratio ROS/Control |
|                                    |                 |                               |                                          |          |            |              | 25                    | 0.5           | 5.4               |
|                                    |                 |                               |                                          |          |            |              | 25                    | 1             | 17.0              |
|                                    |                 |                               |                                          |          |            |              | 25                    | 1.5           | 18.3              |
| [91]                               | 9.5 nm × < 1 µm | Nanocyl                       | A549 lung adenocarcinoma epithelial cell | human    | n          | y            | 25                    | 2             | 10.4              |
|                                    |                 |                               |                                          |          |            |              | 25                    | 3             | 6.9               |
|                                    |                 |                               |                                          |          |            |              | 25                    | 4             | 6.4               |
|                                    |                 |                               |                                          |          |            |              | 2.5                   | 1             | 2.7               |
|                                    |                 |                               |                                          |          |            |              | 10                    | 1             | 6.2               |
|                                    |                 |                               |                                          |          |            |              | 25                    | 1             | 14.9              |

Table S1. Cont.

| Data Compilation: CNT |                     |                               |                                          |          |            |              |                       |               |                   |
|-----------------------|---------------------|-------------------------------|------------------------------------------|----------|------------|--------------|-----------------------|---------------|-------------------|
| Ref.                  | Size (nm)           | Origin of NM/Synthesis Method | Cells                                    | Organism | Phagocytes | Pos. Control | Concentration (µg/mL) | Exp. Time (h) | Ratio ROS/Control |
|                       |                     |                               |                                          |          |            |              | 100                   | 1             | 18.9              |
|                       |                     |                               |                                          |          |            |              | 25                    | 0.5           | 2.2               |
|                       |                     |                               |                                          |          |            |              | 25                    | 1             | 10.3              |
|                       |                     |                               |                                          |          |            |              | 25                    | 1.5           | 9.4               |
|                       |                     |                               |                                          |          |            |              | 25                    | 2             | 7.2               |
|                       |                     |                               | RAW 264.7 macrophages                    | murine   | y          | y            | 25                    | 3             | 4.3               |
|                       |                     |                               |                                          |          |            |              | 25                    | 4             | 3.1               |
|                       |                     |                               |                                          |          |            |              | 2.5                   | 1             | 4.5               |
|                       |                     |                               |                                          |          |            |              | 10                    | 1             | 12.2              |
|                       |                     |                               |                                          |          |            |              | 25                    | 1             | 28.7              |
|                       |                     |                               |                                          |          |            |              | 100                   | 1             | 35.7              |
|                       |                     |                               |                                          |          |            |              | 12.5                  | 72            | 1.0               |
|                       |                     |                               |                                          |          |            |              | 12.5                  | 96            | 0.9               |
|                       |                     |                               |                                          |          |            |              | 25                    | 72            | 1.1               |
|                       |                     |                               |                                          |          |            |              | 25                    | 96            | 1.2               |
| [67]                  | 0.8–1.2 nm × Z µm   | Sigma Aldrich                 | RAEC rat aortic endothelial cells        | rat      | n          | n            | 50                    | 72            | 1.2               |
|                       |                     |                               |                                          |          |            |              | 50                    | 96            | 1.2               |
|                       |                     |                               |                                          |          |            |              | 100                   | 72            | 1.4               |
|                       |                     |                               |                                          |          |            |              | 100                   | 96            | 2.1               |
|                       |                     |                               |                                          |          |            |              | 200                   | 72            | 1.5               |
|                       |                     |                               |                                          |          |            |              | 200                   | 96            | 3.3               |
| [92]                  | 1.2–1.5 nm × 2.5 µm | Sigma                         | A549 lung adenocarcinoma epithelial cell | human    | n          | n            | 125                   | 72            | 4.9               |
|                       |                     |                               |                                          |          |            |              | 250                   | 72            | 13.8              |
|                       |                     |                               |                                          |          |            |              | 500                   | 72            | 19.2              |

Table S1. Cont.

| Data Compilation: CNT |                     |                                                                          |                                             |          |            |              |                       |               |                   |
|-----------------------|---------------------|--------------------------------------------------------------------------|---------------------------------------------|----------|------------|--------------|-----------------------|---------------|-------------------|
| Ref.                  | Size (nm)           | Origin of NM/Synthesis Method                                            | Cells                                       | Organism | Phagocytes | Pos. Control | Concentration (µg/mL) | Exp. Time (h) | Ratio ROS/Control |
| [93]                  | 1.6 nm × 0.8 µm     | CHepTubes                                                                | HGF gingival fibroblast                     | human    | n          | n            | 50                    | 24            | 2.3               |
|                       |                     |                                                                          |                                             |          |            |              | 75                    | 24            | 3.1               |
|                       |                     |                                                                          |                                             |          |            |              | 100                   | 24            | 4.3               |
|                       |                     |                                                                          |                                             |          |            |              | 125                   | 24            | 5.1               |
|                       |                     |                                                                          |                                             |          |            |              | 150                   | 24            | 5.7               |
| [94]                  | 30 nm × < 1 µm      | Lawrence Berkeley National Laboratory; chemical vapour deposition method | HUVECs umbilical vein endothelial cells     | human    | n          | y            | 0.5                   | 2             | 1.1               |
|                       |                     |                                                                          |                                             |          |            |              | 5                     | 2             | 1.2               |
|                       |                     |                                                                          |                                             |          |            |              | 20                    | 2             | 1.9               |
| [95]                  | 50 nm × 0.5–3 µm    | Yangtse Nanotechnology. arc-discharged evaporation                       | A549 lung adenocarcinoma epithelial cell    | human    | n          | y            | 15                    | 1             | 2.6               |
|                       |                     |                                                                          |                                             |          |            |              | 15                    | 1             | 2.7               |
|                       |                     |                                                                          |                                             |          |            |              | 30                    | 1             | 4.5               |
|                       |                     |                                                                          |                                             |          |            |              | 30                    | 1             | 5.6               |
| [45]                  | 110–170 nm × 5–9 µm | Sigma-Aldrich                                                            | A549 lung adenocarcinoma epithelial cell    | human    | n          | n            | 40                    | 4             | 0.8               |
|                       |                     |                                                                          |                                             |          |            |              | 80                    | 4             | 0.9               |
| [96]                  | 15 nm × 0.4–1.2 µm  | SW-COOH; Carboxyl functionalized. Sigma Aldrich                          | Caco-2 epithelial colorectal adenocarcinoma | human    | n          | n            | 5                     | 24            | 0.9               |
|                       |                     |                                                                          |                                             |          |            |              | 10                    | 24            | 1.0               |
|                       |                     |                                                                          |                                             |          |            |              | 50                    | 24            | 1.1               |
|                       |                     |                                                                          |                                             |          |            |              | 100                   | 24            | 1.6               |
|                       |                     |                                                                          |                                             |          |            |              | 500                   | 24            | 3.1               |
|                       |                     |                                                                          |                                             |          |            |              | 1000                  | 24            | 5.1               |
| [62]                  | 10–20 nm × 10–13 µm | Nanostructured & Amorphous Materials                                     | NR8383 alveolar macrophage                  | rat      | y          | n            | 5                     | 24            | 1.8               |
|                       |                     |                                                                          |                                             |          |            |              | 10                    | 24            | 2.2               |
|                       |                     |                                                                          |                                             |          |            |              | 50                    | 24            | 2.5               |
|                       |                     |                                                                          |                                             |          |            |              | 100                   | 24            | 3.7               |

Table S1. Cont.

| Data Compilation: CNT                    |                                                          |                                           |                            |          |            |              |                                    |               |                   |
|------------------------------------------|----------------------------------------------------------|-------------------------------------------|----------------------------|----------|------------|--------------|------------------------------------|---------------|-------------------|
| Ref.                                     | Size (nm)                                                | Origin of NM/Synthesis Method             | Cells                      | Organism | Phagocytes | Pos. Control | Concentration ( $\mu\text{g/mL}$ ) | Exp. Time (h) | Ratio ROS/Control |
|                                          | 1–2 nm $\times$<br>5–15 $\mu\text{m}$                    | Nanostructured & Amorphous Materials      | NR8383 alveolar macrophage | rat      | y          | n            | 5                                  | 24            | 1.8               |
|                                          |                                                          |                                           |                            |          |            |              | 10                                 | 24            | 3.6               |
|                                          |                                                          |                                           |                            |          |            |              | 50                                 | 24            | 4                 |
|                                          |                                                          |                                           |                            |          |            |              | 100                                | 24            | 2.5               |
|                                          | 30–50 nm $\times$<br>10–20 $\mu\text{m}$                 | Nanostructured & Amorphous Materials      | NR8383 alveolar macrophage | rat      | y          | n            | 5                                  | 24            | 1.3               |
|                                          |                                                          |                                           |                            |          |            |              | 10                                 | 24            | 1.6               |
|                                          |                                                          |                                           |                            |          |            |              | 50                                 | 24            | 1.9               |
|                                          |                                                          |                                           |                            |          |            |              | 100                                | 24            | 3.2               |
|                                          | 4–5 nm $\times$<br>0.5–0.6 $\mu\text{m}$                 | SW-PEG; PEG functionalized. Sigma Aldrich | MCF-7 breast cancer        | human    | n          | y            | 5                                  | 1             | 0.9               |
|                                          |                                                          |                                           |                            |          |            |              | 10                                 | 1             | 0.8               |
|                                          |                                                          |                                           |                            |          |            |              | 20                                 | 1             | 0.8               |
|                                          |                                                          |                                           |                            |          |            |              | 40                                 | 1             | 1.0               |
| 4–5 nm $\times$<br>0.5–1.5 $\mu\text{m}$ | SW-COOH; Carboxyl functionalized. Sigma Aldrich          | MCF-7 breast cancer                       | human                      | n        | y          | 80           | 1                                  | 0.7           |                   |
|                                          |                                                          |                                           |                            |          |            | 5            | 1                                  | 0.9           |                   |
|                                          |                                                          |                                           |                            |          |            | 10           | 1                                  | 1.1           |                   |
|                                          |                                                          |                                           |                            |          |            | 20           | 1                                  | 0.9           |                   |
| 4–6 nm $\times$<br>0.7–1 $\mu\text{m}$   | SW-NH <sub>3</sub> ; Amino functionalized. Sigma Aldrich | MCF-7 breast cancer                       | human                      | n        | y          | 40           | 1                                  | 0.7           |                   |
|                                          |                                                          |                                           |                            |          |            | 80           | 1                                  | 0.5           |                   |
|                                          |                                                          |                                           |                            |          |            | 5            | 1                                  | 1.0           |                   |
|                                          |                                                          |                                           |                            |          |            | 10           | 1                                  | 0.9           |                   |
|                                          |                                                          |                                           |                            |          |            |              | 20                                 | 1             | 1.0               |
|                                          |                                                          |                                           |                            |          |            |              | 40                                 | 1             | 1.1               |
|                                          |                                                          |                                           |                            |          |            |              | 80                                 | 1             | 1.1               |
|                                          |                                                          |                                           |                            |          |            |              | 80                                 | 1             | 1.1               |



Table S1. Cont.

| Data Compilation: CNT |                                        |                                                   |                                          |          |            |              |                                    |               |                   |
|-----------------------|----------------------------------------|---------------------------------------------------|------------------------------------------|----------|------------|--------------|------------------------------------|---------------|-------------------|
| Ref.                  | Size (nm)                              | Origin of NM/Synthesis Method                     | Cells                                    | Organism | Phagocytes | Pos. Control | Concentration ( $\mu\text{g/mL}$ ) | Exp. Time (h) | Ratio ROS/Control |
| [98]                  | 8–14 nm $\times$<br>2–4 $\mu\text{m}$  | Bayer Technologies Service                        | A549 lung adenocarcinoma epithelial cell | human    | n          | y            | 3.2                                | 2             | 17.9              |
|                       |                                        |                                                   |                                          |          |            |              | 6.25                               | 2             | 33.8              |
|                       |                                        |                                                   |                                          |          |            |              | 12.5                               | 2             | 55.6              |
|                       |                                        |                                                   |                                          |          |            |              | 25                                 | 2             | 70.5              |
| [69]                  | 1–2 nm $\times$ 20 $\mu\text{m}$       | Beijing Nachen Technology & Development Co., Ltd. | PC12 adrenal gland                       | rat      | n          | n            | 50                                 | 24            | 1.6               |
|                       |                                        |                                                   |                                          |          |            |              | 50                                 | 48            | 2.1               |
|                       | 10–18 nm $\times$<br>2–6 $\mu\text{m}$ | Cheap Tubes                                       | Jurkat T cells                           | human    | n          | y            | 7.5                                | 2             | 2.5               |
|                       |                                        |                                                   |                                          |          |            |              | 15                                 | 2             | 3.7               |
|                       |                                        |                                                   |                                          |          |            |              | 30                                 | 2             | 4.7               |
| [99]                  | 6–10 nm $\times$<br>1–2 $\mu\text{m}$  | Nanocyl SA                                        | Jurkat T cells                           | human    | n          | y            | 7.5                                | 2             | 2.7               |
|                       |                                        |                                                   |                                          |          |            |              | 15                                 | 2             | 4.4               |
|                       | 8–14 nm $\times$<br>2–4 $\mu\text{m}$  | Bayer Technologies Service                        | Jurkat T cells                           | human    | n          | y            | 30                                 | 2             | 5.2               |
|                       |                                        |                                                   |                                          |          |            |              | 7.5                                | 2             | 5.4               |
| [100]                 | 1–2 nm $\times$ 20 $\mu\text{m}$       | Beijing Nachen Technology & Development Co., Ltd. | PC12 adrenal gland                       | rat      | n          | n            | 15                                 | 2             | 7.9               |
|                       |                                        |                                                   |                                          |          |            |              | 30                                 | 2             | 10.2              |
|                       |                                        |                                                   |                                          |          |            |              | 5                                  | 24            | 1.4               |
|                       |                                        |                                                   |                                          |          |            |              | 5                                  | 48            | 1.5               |
|                       |                                        |                                                   |                                          |          |            |              | 50                                 | 24            | 1.6               |
|                       |                                        |                                                   |                                          |          |            |              | 50                                 | 48            | 2.1               |
|                       |                                        |                                                   |                                          |          |            |              | 100                                | 24            | 2.5               |
|                       |                                        |                                                   |                                          |          |            |              | 100                                | 48            | 2.7               |
| 200                   | 24                                     | 5.0                                               |                                          |          |            |              |                                    |               |                   |
| 200                   | 48                                     | 5.3                                               |                                          |          |            |              |                                    |               |                   |

Table S1. Cont.

| Data Compilation: CNT |                                       |                                     |                                                |          |            |              |                                    |               |                   |
|-----------------------|---------------------------------------|-------------------------------------|------------------------------------------------|----------|------------|--------------|------------------------------------|---------------|-------------------|
| Ref.                  | Size (nm)                             | Origin of NM/Synthesis Method       | Cells                                          | Organism | Phagocytes | Pos. Control | Concentration ( $\mu\text{g/mL}$ ) | Exp. Time (h) | Ratio ROS/Control |
| [64]                  | 8 nm $\times$ 5 $\mu\text{m}$         | COCC. Chinese Academy of Science    | Primary embryo fibroblasts                     | mouse    | n          | n            | 5                                  | 24            | 1.1               |
|                       |                                       |                                     |                                                |          |            |              | 10                                 | 24            | 2.3               |
|                       |                                       |                                     |                                                |          |            |              | 20                                 | 24            | 2.6               |
|                       |                                       |                                     |                                                |          |            |              | 50                                 | 24            | 4.0               |
|                       |                                       |                                     |                                                |          |            |              | 100                                | 24            | 4.2               |
| [101]                 | 20–40 nm $\times$ 5–30 $\mu\text{m}$  | Nanotech Port                       | A549 lung adenocarcinoma epithelial cell       | human    | n          | n            | 50                                 | 24            | 1.5               |
|                       |                                       |                                     |                                                |          |            |              | 100                                | 24            | 1.9               |
|                       |                                       |                                     |                                                |          |            |              | 150                                | 24            | 2.1               |
| [62]                  | 0.8–1.2 nm $\times$ 800 nm            | HiPco. Carbon Nanotechnologies      | A549 lung adenocarcinoma epithelial cell       | human    | n          | y            | 50                                 | 1             | 1.0               |
|                       | 1.2–1.5 nm $\times$ 2–5 $\mu\text{m}$ | ArcD. arc discharged. Sigma Aldrich | NHBE normal human primary bronchial epithelial | human    | n          | y            | 50                                 | 1             | 0.8               |
